# Supplementary material
Source: publisher figshare collection journal article supplement (https://acs.figshare.com/ndownloader/files/26109325)
Supplement: Supplementary file 1 [file 26109325]

## *Supporting Information*

### **Multiple Functions of Gas Separation and Vapor Adsorption in a New MOF with Open Tubular Channels**

Yong-Zhi Li,<sup>a</sup> Gang-Ding Wang,<sup>a</sup> Li-Na Ma,<sup>a</sup> Lei Hou,<sup>\*a</sup> and Yao-Yu Wang,<sup>a</sup> and Zhonghua  
Zhu<sup>b</sup>

<sup>a</sup>Key Laboratory of Synthetic and Natural Functional Molecule Chemistry of the Ministry of Education, National Demonstration Center for Experimental Chemistry Education (Northwest University), College of Chemistry & Materials Science, Northwest University, Xi'an, 710069, P. R. China.

<sup>b</sup>School of Chemical Engineering, The University of Queensland, Brisbane 4072, Australia.

<sup>\*</sup>To whom correspondence should be addressed. E-mail: lhou2009@nwu.edu.cn (Lei Hou).

## X-Ray Crystallography

Single crystal X-ray diffraction data of compound **1** was collected at 158(2) K on a Bruker SMART APEX II CCD detector using Mo radiation ( $\lambda = 0.71073 \text{ \AA}$ ). The structure was solved by direct methods and refined on  $F^2$  by full-matrix least-squares procedures with SHELXL-2014 program package. The non-hydrogen atoms were refined anisotropically, while the hydrogen atoms added to their geometrically ideal positions and were refined isotropically. The crystallographic data are listed in Tables S1 and S2.

## GCMC Simulation

All the GCMC simulations were performed for the gas adsorption in the framework by the Sorption module of Material Studio (Accelrys. Materials Studio Getting Started, release 5.0). The framework was considered to be rigid, and the gases were geometry optimized during the simulation. Partial charges for atoms of guest-free framework were derived from Qeq method and QEq\_neutral1.0 parameter. One unit cell was used during the simulations. The interaction energies between the gas molecules and framework were computed through the Coulomb and Lennard-Jones 6-12 (LJ) potentials. All parameters for the atoms were modeled with the universal force field (UFF) embedded in the MS modeling package. A cutoff distance of  $12.5 \text{ \AA}$  was used for LJ interactions, and the Coulombic interactions were calculated by using Ewald summation. For each run, the  $2 \times 10^6$  maximum loading steps,  $2 \times 10^6$  production steps were employed.

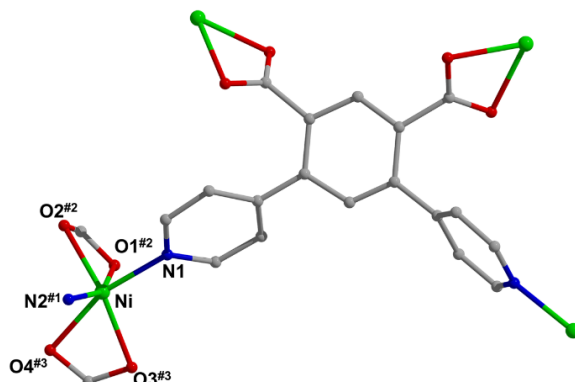

**Figure S1.** Coordination environment of  $\text{Ni}^{2+}$  ion in **1** (Symmetry codes: #1 =  $y+1/2, -x+1/2, -z+3/2$ , #2 =  $-y+1, -x+1, -z+3/2$ , #3 =  $-x+1, y, z+1/2$ ).

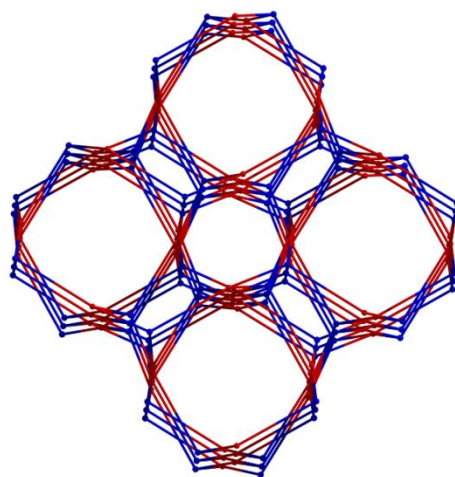

**Figure S2.** 3D (4,4)-c sqc net with the point symbol of  $(4^28^310)(4^28^4)$ .

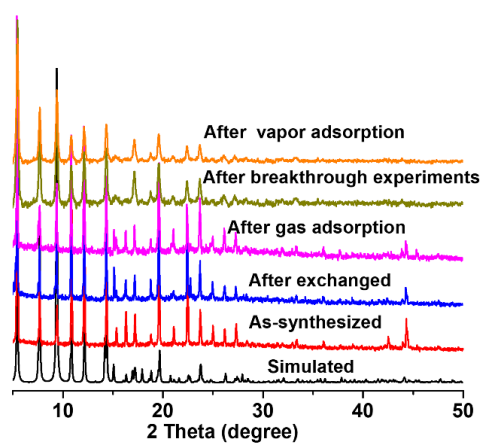

**Figure S3.** Simulated and experimental PXRD of **1**.

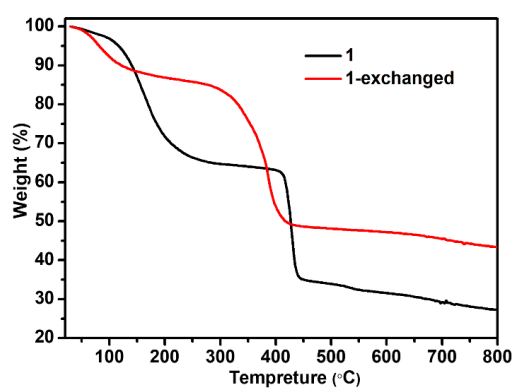

**Figure S4.** TGA curves of as-synthesized and exchanged samples of **1**.

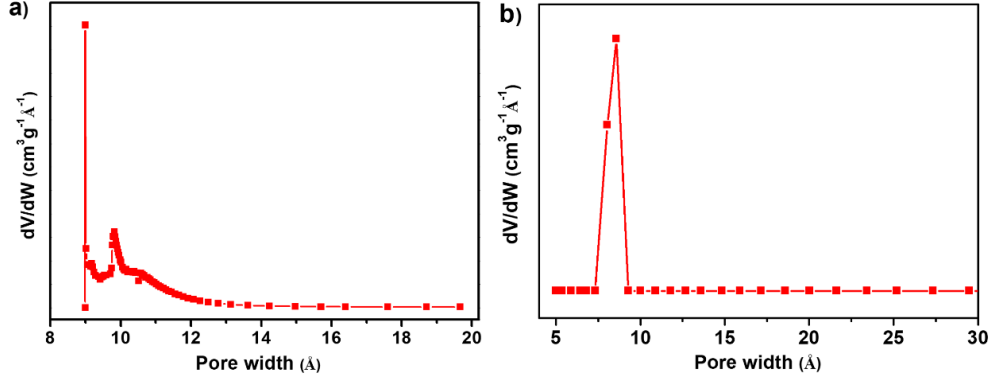

**Figure S5.** Porous distributions of **1a** calculated from N<sub>2</sub> adsorption isotherm at 77 K by the Horvath-Kawazoe model (a) and b) non-local density functional theory (NLDFT) model (b).

### Calculation of sorption heat for gas using Virial 2 model

$$\ln P = \ln N + \frac{1}{T} \sum_{i=0}^m a_i N^i + \sum_{i=0}^n b_i N^i \quad Q_{st} = -R \sum_{i=0}^m a_i N^i$$

The above virial expression was used to fit the combined isotherm data for **1a** at 273.15 and 298 K ( $P$  is the pressure,  $N$  is the adsorbed amount,  $T$  is the temperature,  $a_i$  and  $b_i$  are virial coefficients, and  $m$  and  $N$  are the number of coefficients used to describe the isotherms).  $Q_{st}$  is the coverage-dependent enthalpy of adsorption and  $R$  is the universal gas constant.

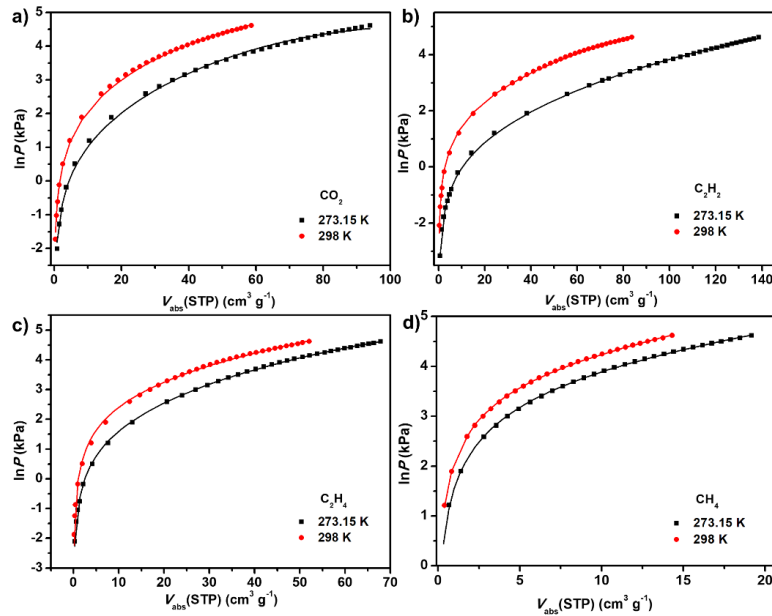

**Figure S6.** a-d) Fitted CO<sub>2</sub>, C<sub>2</sub>H<sub>2</sub>, C<sub>2</sub>H<sub>4</sub> and CH<sub>4</sub> adsorption isotherms for **1a**. Fitted parameters, for C<sub>2</sub>H<sub>2</sub>:  $a_0 = -5016.59958$ ,  $a_1 = 12.93475$ ,  $a_2 = -0.01412$ ,  $b_0 = 15.7983$ ,  $b_1 =$

-0.02425,  $\chi^2 = 0.00249$ ,  $R^2 = 0.99949$ ; for  $C_2H_4$ :  $a_0 = -3031.98597$ ,  $a_1 = 42.47688$ ,  $a_2 = -0.30682$ ,  $b_0 = 10.11803$ ,  $b_1 = -0.12636$ ,  $b_2 = 0.00099$ ,  $\chi^2 = 0.0046$ ,  $R^2 = 0.99877$ ; for  $CH_4$ :  $a_0 = -1711.48531$ ,  $a_1 = 106.4792$ ,  $a_2 = -4.80572$ ,  $b_0 = 7.83856$ ,  $b_1 = -0.39312$ ,  $b_2 = 0.01805$ ,  $\chi^2 = 0.0003$ ,  $R^2 = 0.99959$ ; for  $CO_2$ :  $a_0 = -3651.93584$ ,  $a_1 = 23.25684$ ,  $a_2 = -0.05705$ ,  $b_0 = 11.7393$ ,  $b_1 = -0.04838$ ,  $\chi^2 = 0.00417$ ,  $R^2 = 0.99876$ .

### Selectivity prediction via IAST

The experimental isotherm data for pure gas A, and gas B were fitted at 298 K using a dual Langmuir-Freundlich (L-F) model (Figure S4):

$$q = \frac{a_1 * b_1 * P^{c_1}}{1 + b_1 * P^{c_1}} + \frac{a_2 * b_2 * P^{c_2}}{1 + b_2 * P^{c_2}}$$

Where  $q$  and  $p$  are adsorbed amounts and the pressure of component  $i$ , respectively.

The adsorption selectivities for binary mixtures of gas A/gas B, defined by

$$S_{i/j} = \frac{x_i * y_j}{x_j / y_i}$$

were respectively calculated using the Ideal Adsorption Solution Theory (IAST) of Myers and Prausnitz. Where  $x_i$  is the mole fraction of component  $i$  in the adsorbed phase and  $y_i$  is the mole fraction of component  $i$  in the bulk.

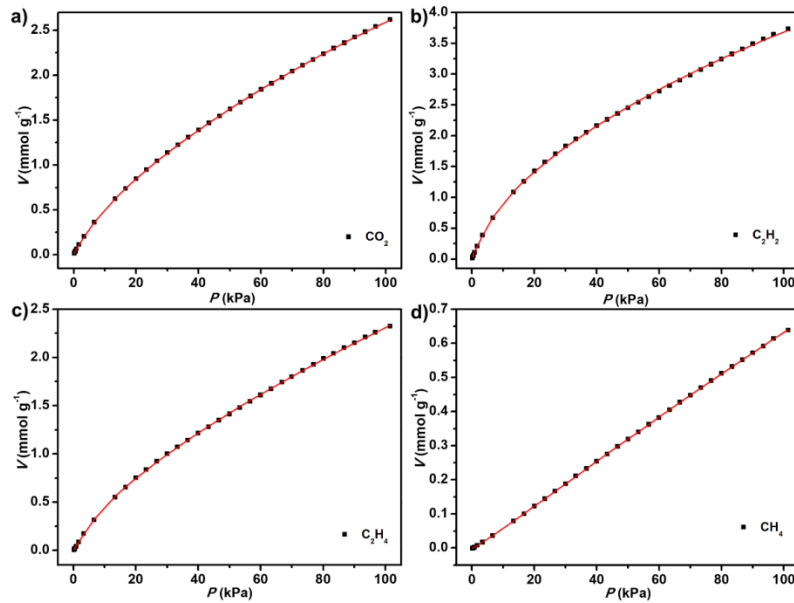

**Figure S7.** a-d) Fitted  $CO_2$ ,  $C_2H_2$ ,  $C_2H_4$  and  $CH_4$  adsorption isotherms for **1a**. Fitted parameters, for  $CO_2$ :  $a_1 = 14.51495$ ,  $b_1 = 0.00511$ ,  $c_1 = 0.80842$ ,  $a_2 = 0.06285$ ,  $b_2 = 0.01147$ ,

$c_2 = 2.30043$ ,  $\chi^2 = 7.8454\text{E-}6$ ,  $R^2 = 0.99999$ ; for  $\text{C}_2\text{H}_2$ :  $a_1 = 15.3714$ ,  $b_1 = 0.00891$ ,  $c_1 = 0.75877$ ,  $a_2 = 0.19682$ ,  $b_2 = 0.01256$ ,  $c_2 = 2.53725$ ,  $\chi^2 = 0.00033$ ,  $R^2 = 0.99981$ ; for  $\text{C}_2\text{H}_4$ :  $a_1 = 16.77069$ ,  $b_1 = 0.00324$ ,  $c_1 = 0.83294$ ,  $a_2 = 0.12197$ ,  $b_2 = 0.01304$ ,  $c_2 = 2.28949$ ,  $\chi^2 = 0.00004$ ,  $R^2 = 0.99993$ ; for  $\text{CH}_4$ :  $a_1 = 3.32963$ ,  $b_1 = 0.00081$ ,  $c_1 = 1.21262$ ,  $a_2 = 0.04822$ ,  $b_2 = 0.02783$ ,  $c_2 = 1.18866$ ,  $\chi^2 = 7.032\text{E-}7$ ,  $R^2 = 0.99999$ .

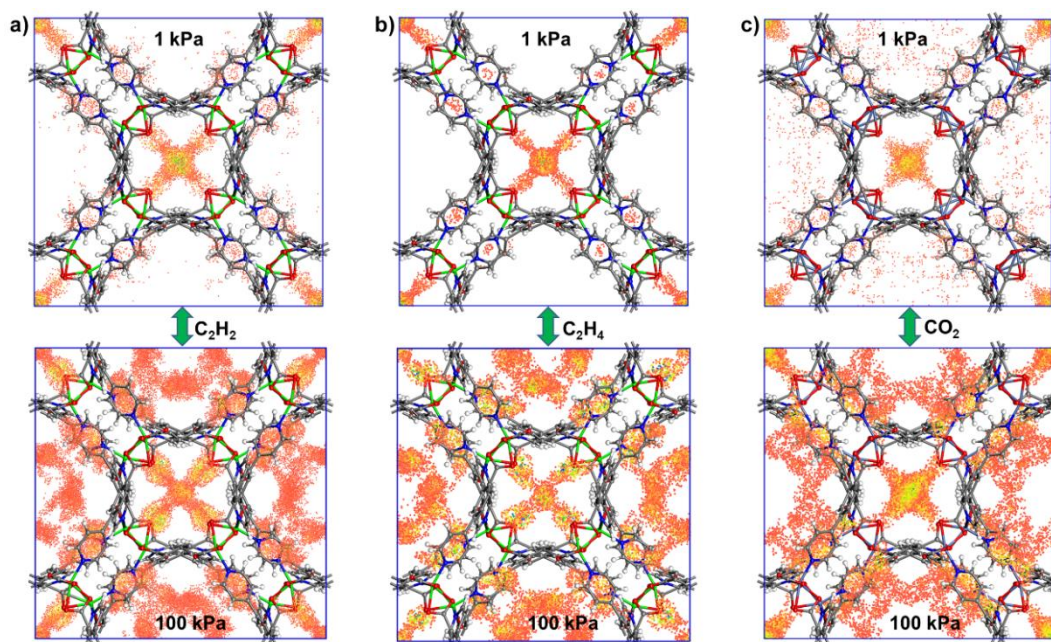

**Figure S8.** Density contours of  $\text{C}_2\text{H}_2$  (a),  $\text{C}_2\text{H}_4$  (b) and  $\text{CO}_2$  (c) adsorption in **1a** obtained from GCMC simulations at 298 K under 1 kPa and 100 kPa, respectively.

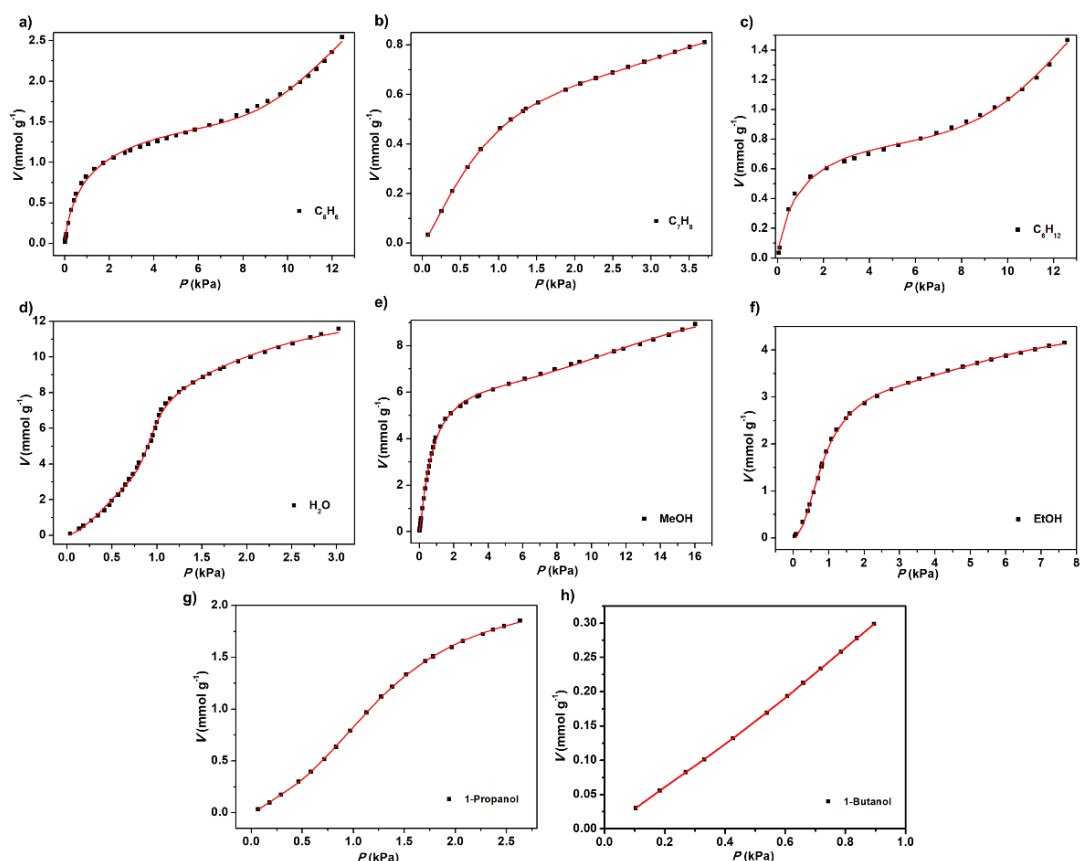

**Figure S9.** (a-h) VOCs adsorption isotherms of **1a** with fitted by dual L-F model, for benzene:  $a_1 = 1.86677$ ,  $b_1 = 0.73767$ ,  $c_1 = 0.78161$ ,  $a_2 = 1.90415$ ,  $b_2 = 8.4021\text{E-}8$ ,  $c_2 = 6.43656$ ,  $\text{Chi}^2 = 0.00119$ ,  $R^2 = 0.99794$ ; for toluene:  $a_1 = 0.85524$ ,  $b_1 = 1.13759$ ,  $c_1 = 1.33393$ ,  $a_2 = 0.11925$ ,  $b_2 = 0.00016$ ,  $c_2 = 6.88569$ ,  $\text{Chi}^2 = 6.204\text{E-}6$ ,  $R^2 = 0.99991$ ; for cyclohexane:  $a_1 = 0.94933$ ,  $b_1 = 0.93693$ ,  $c_1 = 0.88068$ ,  $a_2 = 1.53884$ ,  $b_2 = 5.1542\text{E-}7$ ,  $c_2 = 5.53546$ ,  $\text{Chi}^2 = 0.00047$ ,  $R^2 = 0.99731$ ; for water:  $a_1 = 2.7382$ ,  $b_1 = 2.44623$ ,  $c_1 = 12.80286$ ,  $a_2 = 10.77821$ ,  $b_2 = 0.69176$ ,  $c_2 = 1.59655$ ,  $\text{Chi}^2 = 0.01448$ ,  $R^2 = 0.99903$ ; for MeOH:  $a_1 = 6.89317$ ,  $b_1 = 1.41766$ ,  $c_1 = 1.16138$ ,  $a_2 = 3.26423$ ,  $b_2 = 0.00013$ ,  $c_2 = 3.45521$ ,  $\text{Chi}^2 = 0.00462$ ,  $R^2 = 0.99956$ ; for EtOH:  $a_1 = 3.4174$ ,  $b_1 = 1.31428$ ,  $c_1 = 2.04758$ ,  $a_2 = 1.06477$ ,  $b_2 = 0.00133$ ,  $c_2 = 3.69954$ ,  $\text{Chi}^2 = 0.00103$ ,  $R^2 = 0.99953$ ; for 1-Propanol:  $a_1 = 1.89003$ ,  $b_1 = 0.48556$ ,  $c_1 = 2.55188$ ,  $a_2 = 0.23619$ ,  $b_2 = 8.43597$ ,  $c_2 = 1.49221$ ,  $\text{Chi}^2 = 0.00005$ ,  $R^2 = 0.9999$ ; for 1-Butanol:  $a_1 = 0.9002$ ,  $b_1 = 0.37251$ ,  $c_1 = 1.95485$ ,  $a_2 = 0.10891$ ,  $b_2 = 6.04309$ ,  $c_2 = 1.2868$ ,  $\text{Chi}^2 = 7.9334\text{E-}8$ ,  $R^2 = 0.99999$

**Table S1.** Crystallographic data for **1**.

|                                                                                           |                                                                 |
|-------------------------------------------------------------------------------------------|-----------------------------------------------------------------|
| Chemical formula                                                                          | C <sub>18</sub> H <sub>10</sub> N <sub>2</sub> NiO <sub>4</sub> |
| Formula weight                                                                            | 376.99                                                          |
| <i>T</i> (K)                                                                              | 158(2)                                                          |
| Crystal system                                                                            | Tetragonal                                                      |
| Space group                                                                               | <i>I</i> -4 <i>c</i> 2                                          |
| <i>a</i> , <i>b</i> , <i>c</i> (Å)                                                        | 22.9846(9), 22.9846(9), 23.4908(12)                             |
| <i>α</i> , <i>β</i> , <i>γ</i> (°)                                                        | 90, 90, 90                                                      |
| <i>V</i> (Å <sup>3</sup> )                                                                | 12410.0(12)                                                     |
| <i>Z</i>                                                                                  | 16                                                              |
| <i>D</i> <sub>calcd.</sub> (g cm <sup>-3</sup> )                                          | 0.807                                                           |
| <i>μ</i> (mm <sup>-1</sup> )                                                              | 0.639                                                           |
| Reflns collected/unique/ <i>R</i> <sub>int</sub>                                          | 31579/ 5600/0.1073                                              |
| Goof                                                                                      | 1.036                                                           |
| <i>R</i> <sub>1</sub> <sup>a</sup> , <i>wR</i> <sub>2</sub> <sup>b</sup> ( <i>I</i> > 2σ) | 0.0653, 0.1718                                                  |
| <i>R</i> <sub>1</sub> <sup>a</sup> , <i>wR</i> <sub>2</sub> <sup>b</sup> (all data)       | 0.0892, 0.1952                                                  |

$$^a R_1 = \Sigma ||F_o| - |F_c|| / \Sigma |F_o|; ^b wR_2 = [\Sigma w(F_o^2 - F_c^2)^2 / \Sigma w(F_o^2)^2]^{1/2}.$$

**Table S2.** Selected bond lengths (Å) and angles (°) for **1**.

|                                              |          |                                              |          |
|----------------------------------------------|----------|----------------------------------------------|----------|
| Ni(1)-N(2) <sup>#1</sup>                     | 2.041(6) | N(2) <sup>#1</sup> -Ni(1)-O(3) <sup>#3</sup> | 98.3(2)  |
| Ni(1)-N(1)                                   | 2.047(7) | N(1)-Ni(1)-O(3) <sup>#3</sup>                | 99.8(2)  |
| Ni(1)-O(2) <sup>#2</sup>                     | 2.058(6) | O(2) <sup>#2</sup> -Ni(1)-O(3) <sup>#3</sup> | 156.3(2) |
| Ni(1)-O(3) <sup>#3</sup>                     | 2.086(5) | N(2) <sup>#1</sup> -Ni(1)-O(4) <sup>#3</sup> | 89.4(2)  |
| Ni(1)-O(4) <sup>#3</sup>                     | 2.146(5) | N(1)-Ni(1)-O(4) <sup>#3</sup>                | 162.9(2) |
| Ni(1)-O(1) <sup>#2</sup>                     | 2.155(6) | O(2) <sup>#2</sup> -Ni(1)-O(4) <sup>#3</sup> | 100.0(2) |
| O(3) <sup>#3</sup> -Ni(1)-O(1) <sup>#2</sup> | 99.3(3)  | O(3) <sup>#3</sup> -Ni(1)-O(4) <sup>#3</sup> | 63.2(2)  |
| O(4) <sup>#3</sup> -Ni(1)-O(1) <sup>#2</sup> | 88.7(3)  | N(2) <sup>#1</sup> -Ni(1)-O(1) <sup>#2</sup> | 159.2(3) |
| N(2) <sup>#1</sup> -Ni(1)-N(1)               | 94.7(3)  | N(1)-Ni(1)-O(1) <sup>#2</sup>                | 93.1(3)  |
| N(2) <sup>#1</sup> -Ni(1)-O(2) <sup>#2</sup> | 98.2(2)  | O(2) <sup>#2</sup> -Ni(1)-O(1) <sup>#2</sup> | 61.9(3)  |
| N(1)-Ni(1)-O(2) <sup>#2</sup>                | 95.8(3)  |                                              |          |

Symmetry codes: #1 = *y*+1/2, -*x*+1/2, -*z*+3/2, #2 = -*y*+1, -*x*+1, -*z*+3/2, #3 = -*x*+1, *y*, *z*+1/2.
